# Supplementary material for: Diversity and biogeochemical roles of DNA viruses in Antarctic sea ice
Source: Research Square preprint supplement (doi:10.21203/rs.3.rs-2170382/v1), 2022-10-19
Supplement: Supplementary file 1 [file 08ad2a9359b6799ff0b2e258.xlsx]

## Sheet: Sheet1
Supplementary Table S3 The annotations of ORFs based on VIBRANT
KEGG Entry	Metabolism	Pathway	Total AMGs	Present AMG KOs
map00010	Carbohydrate metabolism	Glycolysis / Gluconeogenesis	4	K00171,K01623,K15634
map00020	Carbohydrate metabolism	Citrate cycle (TCA cycle)	2	K00171,K00240
map00030	Carbohydrate metabolism	Pentose phosphate pathway	9	K00033,K00036,K01619,K01623,K01808,K07404
map00040	Carbohydrate metabolism	Pentose and glucuronate interconversions	18	K00012
map00051	Carbohydrate metabolism	Fructose and mannose metabolism	38	K01623,K01711,K01795,K01808,K02377,K16011
map00052	Carbohydrate metabolism	Galactose metabolism	24	K01784,K01854,K17716
map00053	Carbohydrate metabolism	Ascorbate and aldarate metabolism	18	K00012
map00520	Carbohydrate metabolism	Amino sugar and nucleotide sugar metabolism	106	K00012,K00621,K00820,K00983,K01654,K01711,K01784,K01854,K02377,K02564,K08679,K10011,K12450,K12452,K13010,K13017,K16011,K17716,K20844
map00620	Carbohydrate metabolism	Pyruvate metabolism	2	K00171,K01007
map00630	Carbohydrate metabolism	Glyoxylate and dicarboxylate metabolism	10	K00018,K00122,K00600,K01458,K01915
map00640	Carbohydrate metabolism	Propanoate metabolism	1	K00171
map00650	Carbohydrate metabolism	Butanoate metabolism	2	K00171,K00240
map00562	Carbohydrate metabolism	Inositol phosphate metabolism	4	K01858,K16044,K22230
map00190	Energy metabolism	Oxidative phosphorylation	1	K00240
map00195	Energy metabolism	Photosynthesis	3	K02703,K02706
map00196	Energy metabolism	Photosynthesis - antenna proteins	1	K05383
map00710	Energy metabolism	Carbon fixation in photosynthetic organisms	3	K01623,K01808
map00720	Energy metabolism	Carbon fixation pathways in prokaryotes	4	K00171,K00240,K01007,K01491
map00680	Energy metabolism	Methane metabolism	18	K00018,K00058,K00122,K00171,K00600,K01007,K01079,K01623,K10946,K14940,K15634
map00910	Energy metabolism	Nitrogen metabolism	9	K01673,K01915,K10946
map00920	Energy metabolism	Sulfur metabolism	21	K00390,K00860,K01738
map00061	Lipid metabolism	Fatty acid biosynthesis	1	K00059
map00071	Lipid metabolism	Fatty acid degradation	1	K06445
map00561	Lipid metabolism	Glycerolipid metabolism	1	K01046
map01040	Lipid metabolism	Biosynthesis of unsaturated fatty acids	2	K00507
map00230	Nucleotide metabolism	Purine metabolism	11	K00764,K00860,K01588,K01589,K01933,K01939,K11175
map00240	Nucleotide metabolism	Pyrimidine metabolism	3	K01591
map00250	Amino acid metabolism	Alanine, aspartate and glutamate metabolism	20	K00764,K00820,K01915,K01939,K01953,K13566
map00260	Amino acid metabolism	Glycine, serine and threonine metabolism	15	K00018,K00058,K00542,K00600,K00613,K01079,K15634
map00270	Amino acid metabolism	Cysteine and methionine metabolism	124	K00058,K00558,K01243,K01738,K17398
map00220	Amino acid metabolism	Arginine biosynthesis	4	K01915
map00330	Amino acid metabolism	Arginine and proline metabolism	24	K00472,K00542,K00613,K00931
map00340	Amino acid metabolism	Histidine metabolism	1	K01458
map00360	Amino acid metabolism	Phenylalanine metabolism	15	K00500,K01666,K02612
map00400	Amino acid metabolism	Phenylalanine, tyrosine and tryptophan biosynthesis	1	K00500
map00410	Metabolism of other amino acids	beta-Alanine metabolism	1	K01918
map00440	Metabolism of other amino acids	Phosphonate and phosphinate metabolism	1	K06167
map00460	Metabolism of other amino acids	Cyanoamino acid metabolism	3	K00600
map00480	Metabolism of other amino acids	Glutathione metabolism	4	K00033,K00036,K01270
map00510	Glycan biosynthesis and metabolism	N-Glycan biosynthesis	4	K00737
map00513	Glycan biosynthesis and metabolism	Various types of N-glycan biosynthesis	1	K09673
map00540	Glycan biosynthesis and metabolism	Lipopolysaccharide biosynthesis	19	K00979,K01627,K02536,K02843,K02847,K03269,K03272,K03274
map00550	Glycan biosynthesis and metabolism	Peptidoglycan biosynthesis	1	K07260
map00572	Glycan biosynthesis and metabolism	Arabinogalactan biosynthesis - Mycobacterium	1	K16870
map00740	Metabolism of cofactors and vitamins	Riboflavin metabolism	9	K09474
map00760	Metabolism of cofactors and vitamins	Nicotinate and nicotinamide metabolism	7	K00952,K01916,K03462,K13522
map00770	Metabolism of cofactors and vitamins	Pantothenate and CoA biosynthesis	1	K01918
map00780	Metabolism of cofactors and vitamins	Biotin metabolism	2	K00059,K02169
map00790	Metabolism of cofactors and vitamins	Folate biosynthesis	59	K00287,K00500,K01495,K01724,K01737,K03639,K06879,K06920,K09457,K10026
map00670	Metabolism of cofactors and vitamins	One carbon pool by folate	11	K00287,K00600,K01491,K11175
map00860	Metabolism of cofactors and vitamins	Porphyrin and chlorophyll metabolism	79	K04034,K09882,K09883,K22227,K22316
map00130	Metabolism of cofactors and vitamins	Ubiquinone and other terpenoid-quinone biosynthesis	7	K00568,K03183
map00900	Metabolism of terpenoids and polyketides	Terpenoid backbone biosynthesis	1	K13273
map00523	Metabolism of terpenoids and polyketides	Polyketide sugar unit biosynthesis	24	K00067,K00973,K01710,K12710,K13329,K21328,K23144
map01055	Metabolism of terpenoids and polyketides	Biosynthesis of vancomycin group antibiotics	8	K01710
map00332	Biosynthesis of other secondary metabolites	Carbapenem biosynthesis	1	K00931
map00521	Biosynthesis of other secondary metabolites	Streptomycin biosynthesis	19	K00067,K00973,K01710,K01858,K23144
map00525	Biosynthesis of other secondary metabolites	Acarbose and validamycin biosynthesis	12	K00973,K01710,K23144
map00404	Biosynthesis of other secondary metabolites	Staurosporine biosynthesis	4	K14266
map00333	Biosynthesis of other secondary metabolites	Prodigiosin biosynthesis	1	K00059
map00998	Biosynthesis of other secondary metabolites	Biosynthesis of secondary metabolites - other antibiotics	3	K02078
map00362	Xenobiotics biodegradation and metabolism	Benzoate degradation	2	K01666
map00622	Xenobiotics biodegradation and metabolism	Xylene degradation	2	K01666
map00633	Xenobiotics biodegradation and metabolism	Nitrotoluene degradation	1	K00171
map00621	Xenobiotics biodegradation and metabolism	Dioxin degradation	2	K01666
map04122	Folding, sorting and degradation	Sulfur relay system	12	K03639,K21029,K21140
