# Supplementary material for: Diversity and biogeochemical roles of DNA viruses in Antarctic sea ice
Source: Research Square preprint supplement (doi:10.21203/rs.3.rs-2170382/v1), 2022-10-19
Supplement: Supplementary file 2 [file 3618a5e7d609f659269910a8.xlsx]

## Sheet: Sheet1
Supplementary Table S1 Sample information of ASIWV
Sample name	Sampling Date	Hour(NewZealand)	Longitude [E]	Latitude [S]
Ice1	20191109	10:35:00	166.401	77.6369
Ice2	20191110	08:50:00	166.401	77.6369
Ice3	20191118	12:15:00	166.401	77.6369
Ice4	20191124	09:35:00	166.401	77.6369
Ice5	20191124	10:35:00	166.401	77.6369
SW1	20191111	08:45:00	166.401	77.6369
SW2	20191113	08:50:00	166.401	77.6369
SW3	20191115	09:00:00	166.401	77.6369
SW4	20191119	09:20:00	166.401	77.6369
SW5	20191121	09:20:00	166.401	77.6369
SW6	20191125	09:30:00	166.401	77.6369
