# Supplementary material for: Diversity and biogeochemical roles of DNA viruses in Antarctic sea ice
Source: Research Square preprint supplement (doi:10.21203/rs.3.rs-2170382/v1), 2022-10-19
Supplement: Supplementary file 3 [file 3d17c3cda40efcf1f508f6ce.xlsx]

## Sheet: Sheet1
Supplementary Table S2 Basic information about the Antarctic Sea Ice and Sea Water virome
Station	Raw base (G)	Clean reads	GC content (%)	Contigs (>1.5K)	Viral contigs	number of vOTU
Ice1	12.8	33910533	63	7971	339	193
Ice2	17.5	47081905	60	3032	232	116
Ice3	15.8	42047282	53	8963	228	115
Ice4	15.9	42799606	52	7837	452	246
Ice5	12.2	33732721	49	13849	200	126
SW1	12.7	34955880	44	43124	10676	8576
SW2	12.6	34799222	47	33332	6642	3555
SW3	11.6	32388415	50	24919	4284	2003
SW4	12.2	34068692	61	6168	241	153
SW5	14.7	41067501	61	5398	681	322
SW6	10.7	29797578	49	24445	4194	1879
