# Supplementary material for: Diversity and biogeochemical roles of DNA viruses in Antarctic sea ice
Source: Research Square preprint supplement (doi:10.21203/rs.3.rs-2170382/v1), 2022-10-19
Supplement: Supplementary file 4 [file b53534d36f0139325768111f.xlsx]

## Sheet: Sheet1
Supplementary Table S4 The annotations of ORFs based on CAZyme
genes	CAZyme
Ice1_121_length_60137_cov_125.218052_77	APQ42527.1|GH25|
Ice1_126_length_56290_cov_15.937281_2	AJD51075.1|GH24|
Ice1_156_length_46138_cov_153.983595_46	ANY67740.1|CBM50|
Ice1_257_length_16196_cov_16.723623_27	QDH50676.1|GT11|
Ice2_109_length_83555_cov_43.552323_61	AAW45538.1|GT66|
Ice2_109_length_83555_cov_43.552323_62	ADV23916.1|GT66|
Ice2_109_length_83555_cov_43.552323_63	AUB27077.1|GT66|
Ice2_46_length_232730_cov_42.627029_100	ADV22545.1|GH5_9|
Ice2_46_length_232730_cov_42.627029_260	AUB25440.1|GH128|
Ice2_46_length_232730_cov_42.627029_272	AFR95631.1|GH13_1|
Ice2_46_length_232730_cov_42.627029_66	AAW44487.1|GH71|
Ice2_71_length_157867_cov_41.519371_141	ACV81034.1|GH31|
Ice2_71_length_157867_cov_41.519371_142	ANK63521.1|GH31|
Ice2_746_length_3958_cov_4.530361_2	QHN63453.1|GH26|
Ice2_746_length_3958_cov_4.530361_3	QHN63454.1|GT2|
Ice3_1291_length_5770_cov_5.281715_6	QAY63367.1|GT2|
Ice3_347_length_32815_cov_238.774206_12	AEO01030.1|GH108|
Ice3_4202_length_2497_cov_4.581081_1	BAQ90018.1|GH24|
Ice4_236_length_48142_cov_13.923784_28	BBC99087.1|GH19|
Ice4_285_length_39453_cov_178.022996_37	SEI23589.1|GH19|
Ice4_347_length_33029_cov_91.315825_16	ARB06264.1|GH108|
Ice4_391_length_28780_cov_56.327763_37	AKJ74322.1|GH24|
Ice4_391_length_28780_cov_56.327763_38	APQ22348.1|GH104|
Ice4_6498_length_1679_cov_4.472291_3	AGE60526.1|GH108|
Ice4_714_length_15809_cov_12.165672_17	QDR24496.1|GH19|
Ice5_2458_length_4637_cov_6.447621_6	ARB06264.1|GH108|
Ice5_328_length_46123_cov_301.231875_23	AWN47118.1|GH108|
Ice5_8102_length_2048_cov_3.009533_1	AZI60811.1|GT4|
Ice5_8102_length_2048_cov_3.009533_2	AUS30829.1|GT26|
SW1_1019_length_26236_cov_32.310225_16	CAB4138825.1|GH24|
SW1_102_length_143587_cov_10.967359_116	CAB4142952.1|GT2|
SW1_10591_length_3805_cov_21.161867_3	BAR35063.1|GT4|
SW1_10591_length_3805_cov_21.161867_4	BAR35064.1|GT4|
SW1_11217_length_3654_cov_6.240622_1	BAR35064.1|GT4|
SW1_11435_length_3608_cov_13.902618_5	CAB4170533.1|GH19|
SW1_11780_length_3531_cov_156.086306_1	BAR16252.1|GH24|
SW1_11780_length_3531_cov_156.086306_2	BAR16119.1|GH24|
SW1_1184_length_23384_cov_12.848429_20	ALL27396.1|GH24|
SW1_13188_length_3265_cov_3.537695_5	BAQ88139.1|GH24|
SW1_13443_length_3225_cov_4.417350_3	CAB4138527.1|GT4|
SW1_14289_length_3098_cov_5.479132_8	QKX55093.1|AA3_2|
SW1_14540_length_3064_cov_43.085078_3	ANS04592.1|GH24|
SW1_1459_length_19329_cov_19.466172_14	BAR35064.1|GT4|
SW1_1459_length_19329_cov_19.466172_19	BAR35060.1|GT2|
SW1_16119_length_2857_cov_12.377231_4	QBQ72575.1|GH24|
SW1_1636_length_17404_cov_52.767249_18	BAR35045.1|GT2|
SW1_17832_length_2681_cov_5.829018_3	BAQ89469.1|GH24|
SW1_18795_length_2588_cov_5.306751_1	AEG94420.1|GH18|GH8|
SW1_19719_length_2504_cov_5.389138_6	BAR35045.1|GT2|
SW1_2000_length_14436_cov_19.399555_18	BAR35045.1|GT2|
SW1_20020_length_2481_cov_3.809563_3	AGE60526.1|GH108|
SW1_20879_length_2413_cov_6.979644_2	BAR35060.1|GT2|
SW1_21520_length_2364_cov_16.744045_8	BAR35045.1|GT2|
SW1_2189_length_13365_cov_5.025019_8	QKX55093.1|AA3_2|
SW1_2500_length_11844_cov_6.012978_19	AFV13073.1|GT4|
SW1_25190_length_2132_cov_54.288397_1	BAR35064.1|GT4|
SW1_2577_length_11561_cov_5.792543_2	BAQ88139.1|GH24|
SW1_26950_length_2039_cov_56.991935_2	QKX55093.1|AA3_2|
SW1_31200_length_1852_cov_6.371174_4	CAB4125529.1|GT4|
SW1_31864_length_1827_cov_37.699774_1	AUR94660.1|GH24|
SW1_32767_length_1794_cov_5.395055_1	AIF05953.1|GH13|
SW1_32888_length_1790_cov_4.120461_1	BAQ88139.1|GH24|
SW1_3353_length_9241_cov_4.884825_1	BAR35045.1|GT2|
SW1_33886_length_1756_cov_4.485597_2	BAR35045.1|GT2|
SW1_34164_length_1747_cov_1.864066_1	CAB4125485.1|GT11|
SW1_3808_length_8289_cov_10.954943_14	BAR35060.1|GT2|
SW1_3808_length_8289_cov_10.954943_9	BAR35064.1|GT4|
SW1_458_length_51365_cov_15.141142_16	BAR35045.1|GT2|
SW1_458_length_51365_cov_15.141142_43	BAR35060.1|GT2|
SW1_458_length_51365_cov_15.141142_46	BAR35063.1|GT4|
SW1_458_length_51365_cov_15.141142_48	BAR35064.1|GT4|
SW1_4730_length_6951_cov_15.598173_9	BAQ89358.1|GH23|
SW1_4731_length_6951_cov_10.444461_8	AWK41296.1|GT51|
SW1_6097_length_5727_cov_9.630642_8	AGE60636.1|GH24|
SW1_6545_length_5414_cov_4.836163_1	BAR34757.1|GH108|
SW1_6761_length_5285_cov_3.998662_8	ADE38607.1|GH108|
SW1_6899_length_5209_cov_7.974777_5	QBQ72575.1|GH24|
SW1_6906_length_5202_cov_10.347581_1	BAQ85478.1|GH24|
SW1_6931_length_5189_cov_2.769186_12	QKX55093.1|AA3_2|
SW1_723_length_35240_cov_12.753617_22	AGE60526.1|GH108|
SW1_723_length_35240_cov_12.753617_51	QKX55093.1|AA3_2|
SW1_8622_length_4417_cov_53.707932_11	BAR35045.1|GT2|
SW1_8756_length_4373_cov_5.062529_4	BAR16220.1|GH24|
SW1_8861_length_4336_cov_18.363700_4	CAB4138527.1|GT4|
SW1_994_length_26868_cov_29.336628_25	BAR35064.1|GT4|
SW1_994_length_26868_cov_29.336628_29	BAR35060.1|GT2|
SW1_9991_length_3962_cov_17.184797_3	BAQ88139.1|GH24|
SW1_9994_length_3961_cov_7.684844_1	ARF52394.1|GH24|
SW2_10032_length_4022_cov_6.746660_5	BAQ90018.1|GH24|
SW2_11914_length_3491_cov_29.452561_1	BAR35063.1|GT4|
SW2_11914_length_3491_cov_29.452561_2	BAR35064.1|GT4|
SW2_14216_length_3006_cov_4.346662_9	AGI73654.1|GH0|
SW2_1575_length_17794_cov_14.283838_41	BAR35045.1|GT2|
SW2_1675_length_16999_cov_97.275614_8	BAR33111.1|GH19|
SW2_1784_length_16105_cov_5.337757_16	QKX55093.1|AA3_2|
SW2_20375_length_2230_cov_11.423908_1	CAB4166167.1|GH19|
SW2_20460_length_2222_cov_4.425473_2	BAR19446.1|GH19|
SW2_22355_length_2065_cov_15.812438_4	BAR35045.1|GT2|
SW2_2309_length_13054_cov_6.566044_21	QKX55093.1|AA3_2|
SW2_27063_length_1774_cov_6.373473_7	QKX55093.1|AA3_2|
SW2_27465_length_1753_cov_4.060071_1	BAR35064.1|GT4|
SW2_28192_length_1718_cov_10.024654_1	BAR34129.1|GH108|
SW2_2856_length_11132_cov_17.227679_4	BAR35064.1|GT4|
SW2_2856_length_11132_cov_17.227679_8	BAR35060.1|GT2|
SW2_30437_length_1614_cov_16.537524_2	ARF52394.1|GH24|
SW2_3067_length_10490_cov_12.324102_20	BAR34129.1|GH108|
SW2_3095_length_10419_cov_9.153802_10	BAR35063.1|GT4|
SW2_3095_length_10419_cov_9.153802_11	BAR35064.1|GT4|
SW2_3095_length_10419_cov_9.153802_7	BAR35060.1|GT2|
SW2_32497_length_1532_cov_3.387949_1	BAR35045.1|GT2|
SW2_3564_length_9237_cov_29.567850_19	BAR16220.1|GH24|
SW2_4030_length_8345_cov_4.483474_7	BAR34129.1|GH108|
SW2_4138_length_8185_cov_18.029520_1	CAB4170533.1|GH19|
SW2_4663_length_7473_cov_11.353869_10	CAB4160003.1|GT0|
SW2_4663_length_7473_cov_11.353869_7	CAB4138527.1|GT4|
SW2_4663_length_7473_cov_11.353869_8	CAB4138528.1|GT0|
SW2_4746_length_7365_cov_3.924077_13	BAR35045.1|GT2|
SW2_489_length_43118_cov_45.079813_44	AUR94660.1|GH24|
SW2_5532_length_6536_cov_23.908810_11	QDT59474.1|GH5|
SW2_580_length_38344_cov_10.812374_59	QKX55093.1|AA3_2|
SW2_583_length_38194_cov_23.551011_52	QIC67480.1|GH19|
SW2_5848_length_6292_cov_3.248357_7	ADW08426.1|GH24|
SW2_6316_length_5924_cov_13.967456_9	QKX55093.1|AA3_2|
SW2_6756_length_5601_cov_5.143527_2	CAB4155292.1|GT2|
SW2_7001_length_5444_cov_13.184635_3	AGE60526.1|GH108|
SW2_709_length_32585_cov_7.610667_3	QBQ72575.1|GH24|
SW2_8530_length_4610_cov_3.922283_4	BAR35064.1|GT4|
SW2_9559_length_4183_cov_4.136870_5	ANU08685.1|GT0|
SW2_9559_length_4183_cov_4.136870_6	ANU08684.1|GT2|
SW2_986_length_25045_cov_7.035734_28	BAR35060.1|GT2|
SW2_986_length_25045_cov_7.035734_33	BAR35064.1|GT4|
SW2_986_length_25045_cov_7.035734_6	BAR35045.1|GT2|
SW2_987_length_25035_cov_10.761970_8	AGE60526.1|GH108|
SW3_1300_length_13705_cov_9.834139_4	QKX55093.1|AA3_2|
SW3_14547_length_2118_cov_4.533204_3	QKX60855.1|GT22|
SW3_19356_length_1767_cov_5.708528_4	BAR35060.1|GT2|
SW3_2132_length_8359_cov_6.262163_7	QBQ72575.1|GH24|
SW3_2447_length_7368_cov_10.551210_9	BAR35045.1|GT2|
SW3_24790_length_1504_cov_6.919945_5	CAB4141578.1|GH108|
SW3_4033_length_4987_cov_7.786496_7	BAR37017.1|GH24|
SW3_4145_length_4880_cov_4.070052_9	CAB4138825.1|GH24|
SW3_530_length_33595_cov_17.652832_17	QDU93710.1|GH5|
SW3_5634_length_3938_cov_4.371877_1	BAQ84197.1|GH24|
SW3_6047_length_3752_cov_11.022180_1	BAR35045.1|GT2|
SW3_8293_length_3046_cov_4.050150_8	AIA25173.1|GH24|
SW3_836_length_22004_cov_9.212857_1	QKX55093.1|AA3_2|
SW3_9510_length_2774_cov_5.857300_4	BAR34129.1|GH108|
SW3_958_length_19104_cov_7.403696_8	BAQ89608.1|GH24|
SW4_159_length_55459_cov_20.788373_26	QBQ72575.1|GH24|
SW5_1136_length_5029_cov_3.935867_2	BAN03947.1|GH3|
SW5_1136_length_5029_cov_3.935867_3	BAN03948.1|GH13_30|
SW5_1272_length_4588_cov_3.410986_1	QGG96388.1|GH0|
SW5_1272_length_4588_cov_3.410986_3	QGG96386.1|GT4|
SW5_200_length_30308_cov_5.481837_22	BAQ89608.1|GH24|
SW5_2643_length_2527_cov_4.811489_1	QHJ78978.1|GH24|
SW6_10517_length_3034_cov_6.393421_6	BAQ88139.1|GH24|
SW6_11845_length_2740_cov_3.455121_3	QKX55093.1|AA3_2|
SW6_13940_length_2389_cov_2.824336_3	QBQ72575.1|GH24|
SW6_15062_length_2235_cov_6.319266_2	BAR35064.1|GT4|
SW6_15500_length_2180_cov_2.306824_6	QKX55093.1|AA3_2|
SW6_1909_length_14163_cov_8.099943_16	BAR35064.1|GT4|
SW6_19965_length_1766_cov_3.103448_1	AEF41245.1|GH65|
SW6_21481_length_1665_cov_2.360248_2	QEO97765.1|GH28|
SW6_4825_length_6242_cov_12.892840_4	QGZ33004.1|GH23|
SW6_508_length_40360_cov_9.113038_41	ALC12461.1|GH23|
SW6_5878_length_5174_cov_9.120531_4	QKX55093.1|AA3_2|
SW6_7242_length_4228_cov_4.340043_8	AGE60526.1|GH108|
SW6_8375_length_3718_cov_22.016380_6	QDT59474.1|GH5|
SW6_981_length_24379_cov_103.416132_23	BCA44326.1|GH24|
SW6_981_length_24379_cov_103.416132_4	BCA44326.1|GH24|
